# Supplementary material for: Structure of supramolecular astaxanthin aggregates revealed by molecular dynamics and electronic circular dichroism spectroscopy
Source: Royal Society of Chemistry journal article supplement (doi:10.1039/c8cp01742e), 2018-01-01
Supplement: c8cp01742e1.pdf [file c8cp01742e1.pdf]

## Supplementary Information

# Structure of supramolecular astaxanthin aggregates revealed by molecular dynamics and electronic circular dichroism spectroscopy

*Grzegorz Zajac,<sup>1</sup> Ewa Machalska,<sup>1</sup> Agnieszka Kaczor,<sup>1,2</sup> Jiří Kessler,<sup>3</sup> Petr Bouř,<sup>\*,3</sup> Malgorzata Baranska<sup>\*,1,2</sup>*

<sup>1</sup> Faculty of Chemistry, Jagiellonian University, Gronostajowa 2, Krakow 30-387, Poland

<sup>2</sup> Jagiellonian Centre for Experimental Therapeutics (JCET), Jagiellonian University,  
Bobrzynskiego 14, Krakow 30-348, Poland

<sup>3</sup> Institute of Organic Chemistry and Biochemistry, Academy of Sciences, Flemingovo náměstí 2,  
Prague, 16610, Czech Republic

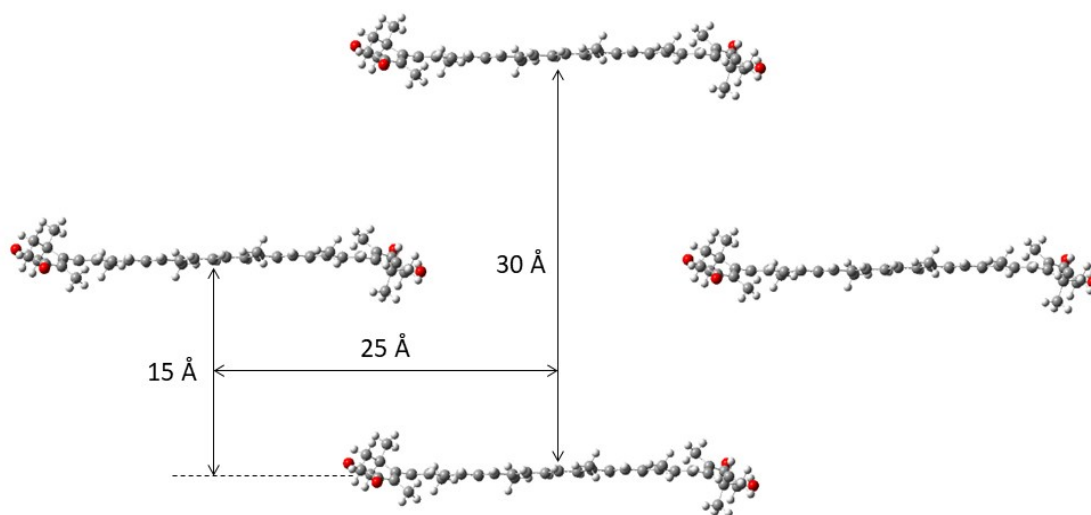

**Fig. S1** Details of the J-aggregate model structure.

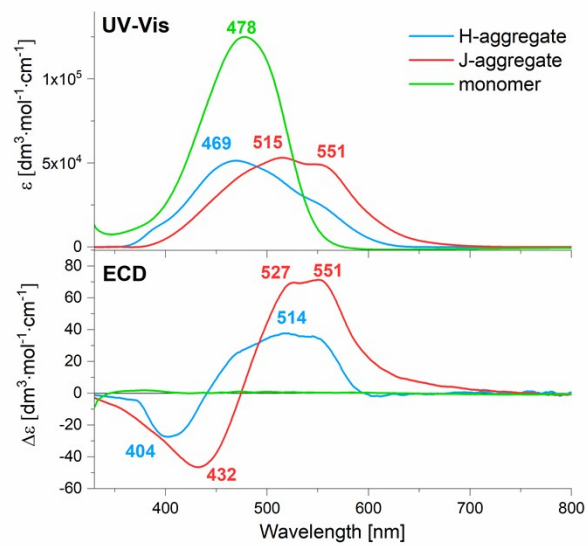

**Fig. S2** Experimental UV-Vis and ECD spectra of the H-, J-aggregate and monomer of AXT.

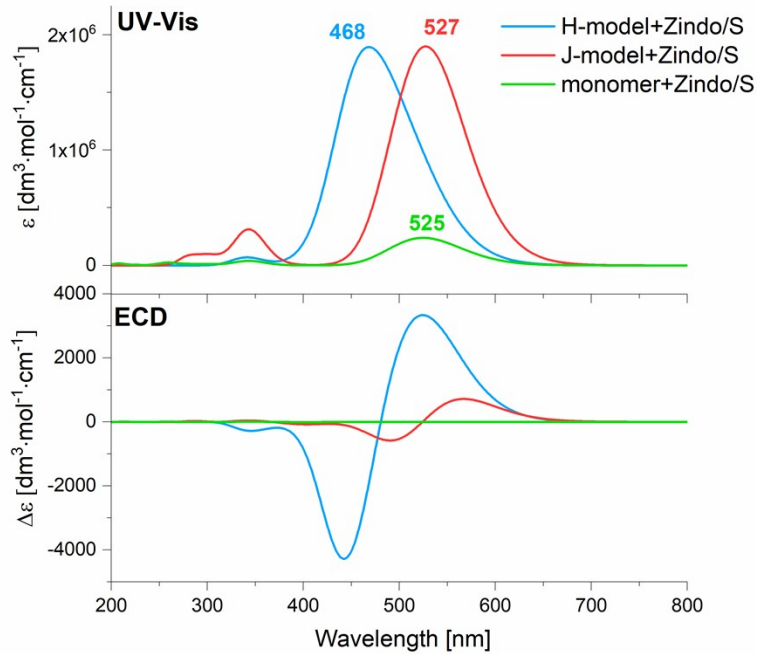

**Fig. S3** Calculated UV-Vis and ECD spectra of the H- and J-aggregates arbitrary models and monomer at the ZIndo/S theory level.

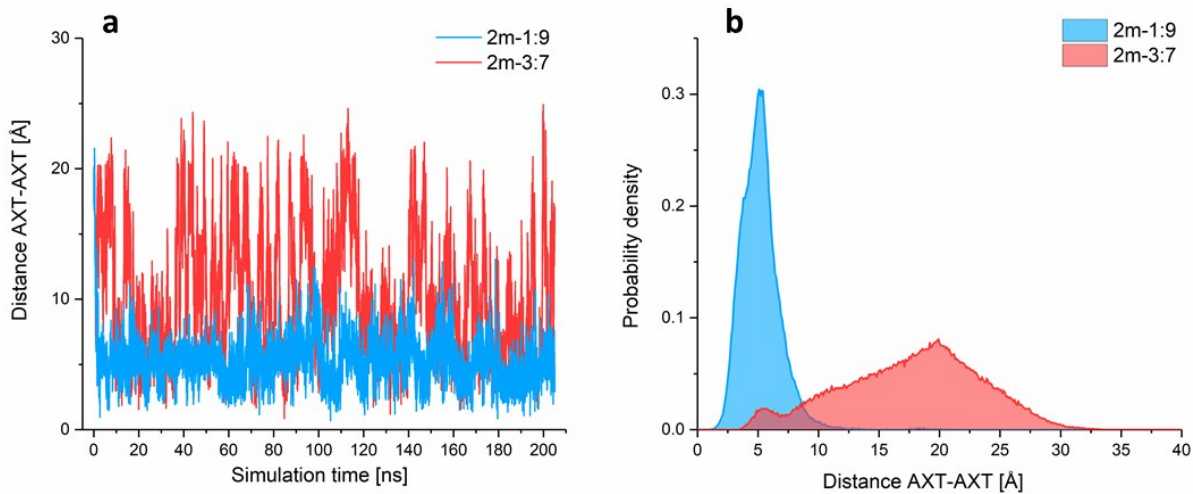

**Fig. S4** AXT-AXT distance curves versus MD simulation times, and AXT-AXT distance histograms for 1:9 and 3:7-dimer models.

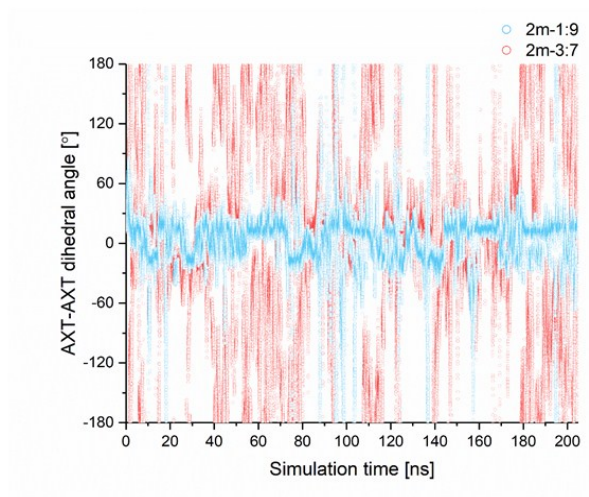

**Fig. S5** AXT-AXT dihedral angle curves versus MD simulation times for 1:9 and 3:7-dimer models.

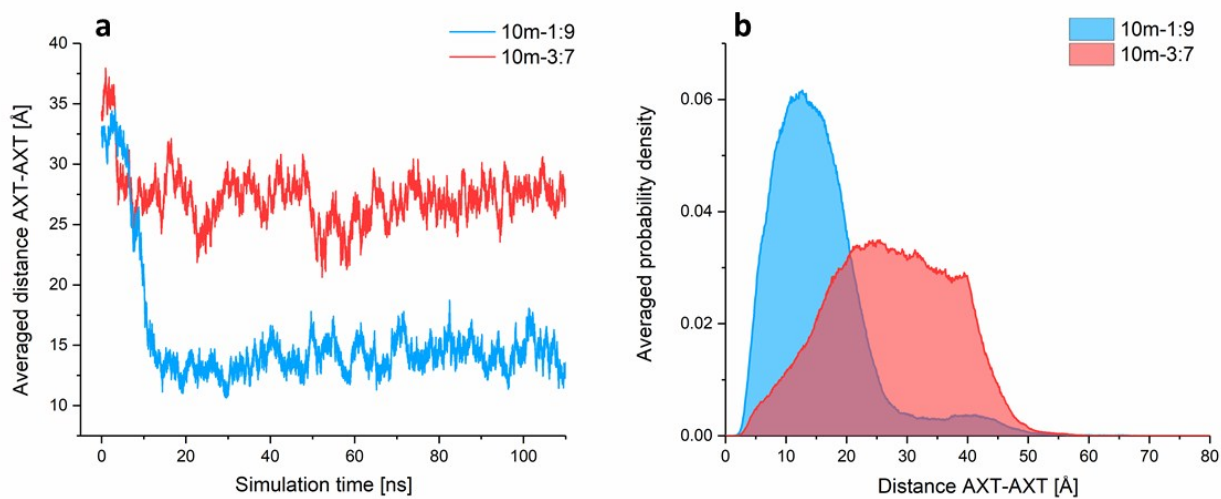

**Fig. S6** Averaged AXT-AXT distance curves versus MD simulation times, and AXT-AXT distance histograms for 1:9 and 3:7-decamer models.

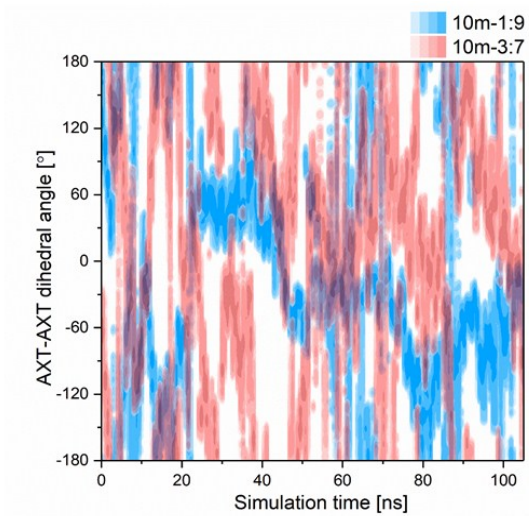

**Fig. S7** AXT-AXT dihedral angle density curves versus MD simulation times for 1:9 and 3:7-decamer models.

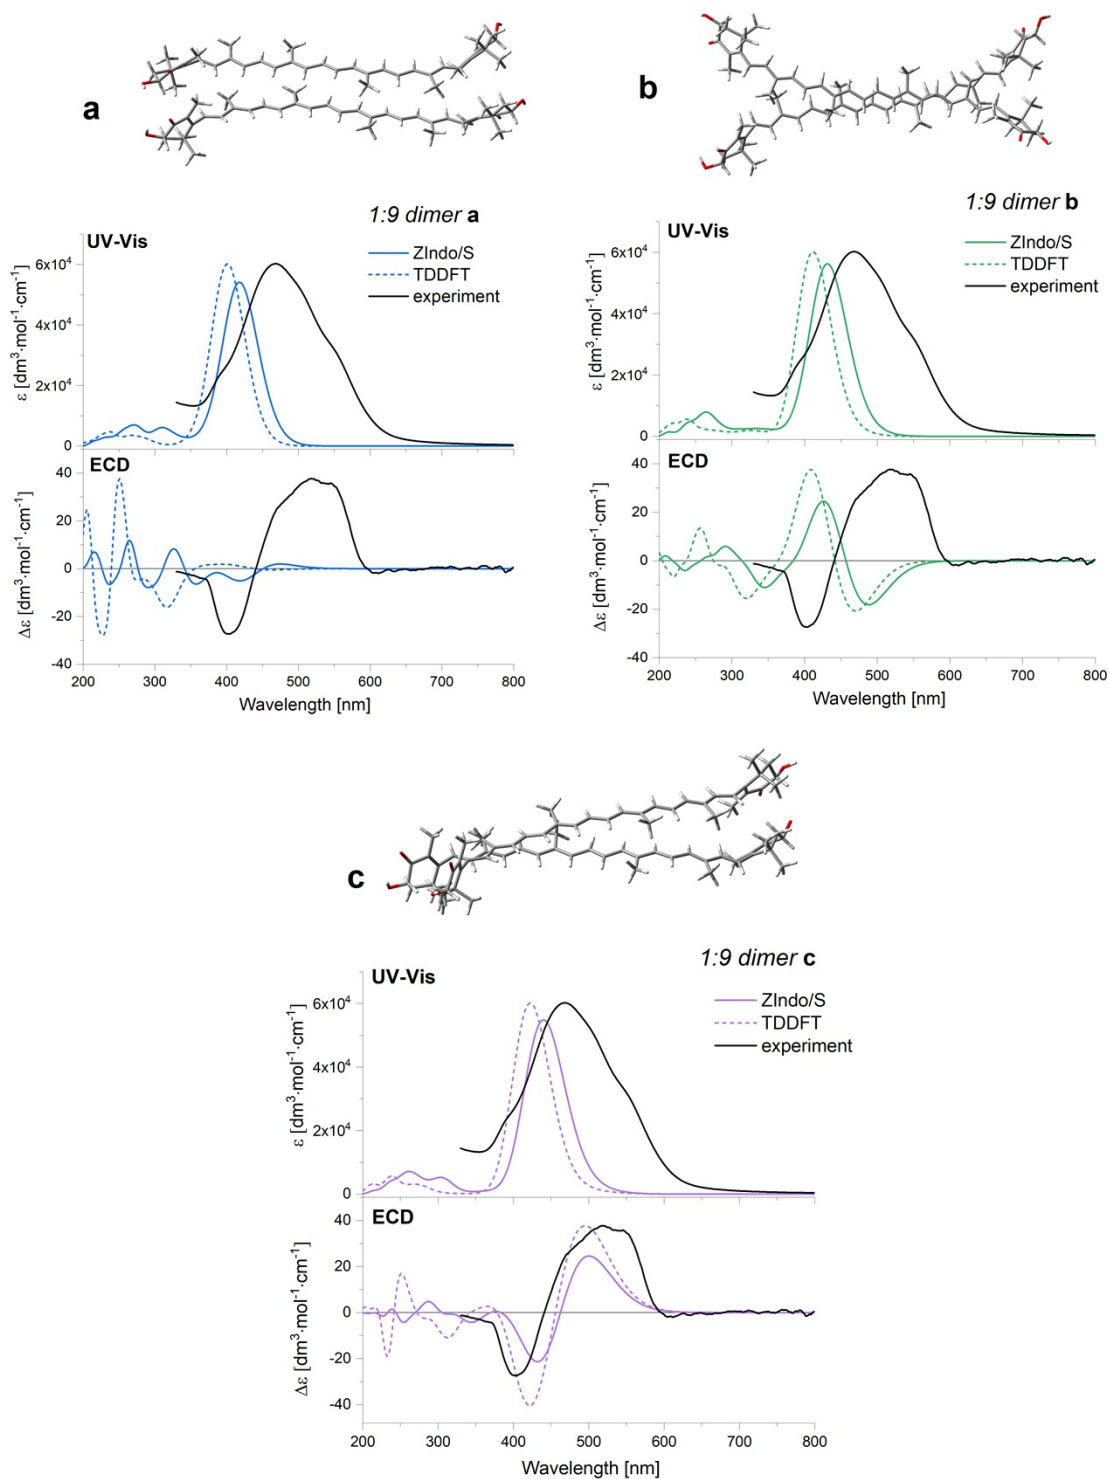

**Fig. S8** UV-Vis and ECD spectra of typical structures taken from the 1:9 (a-c) dimer MD simulation models.

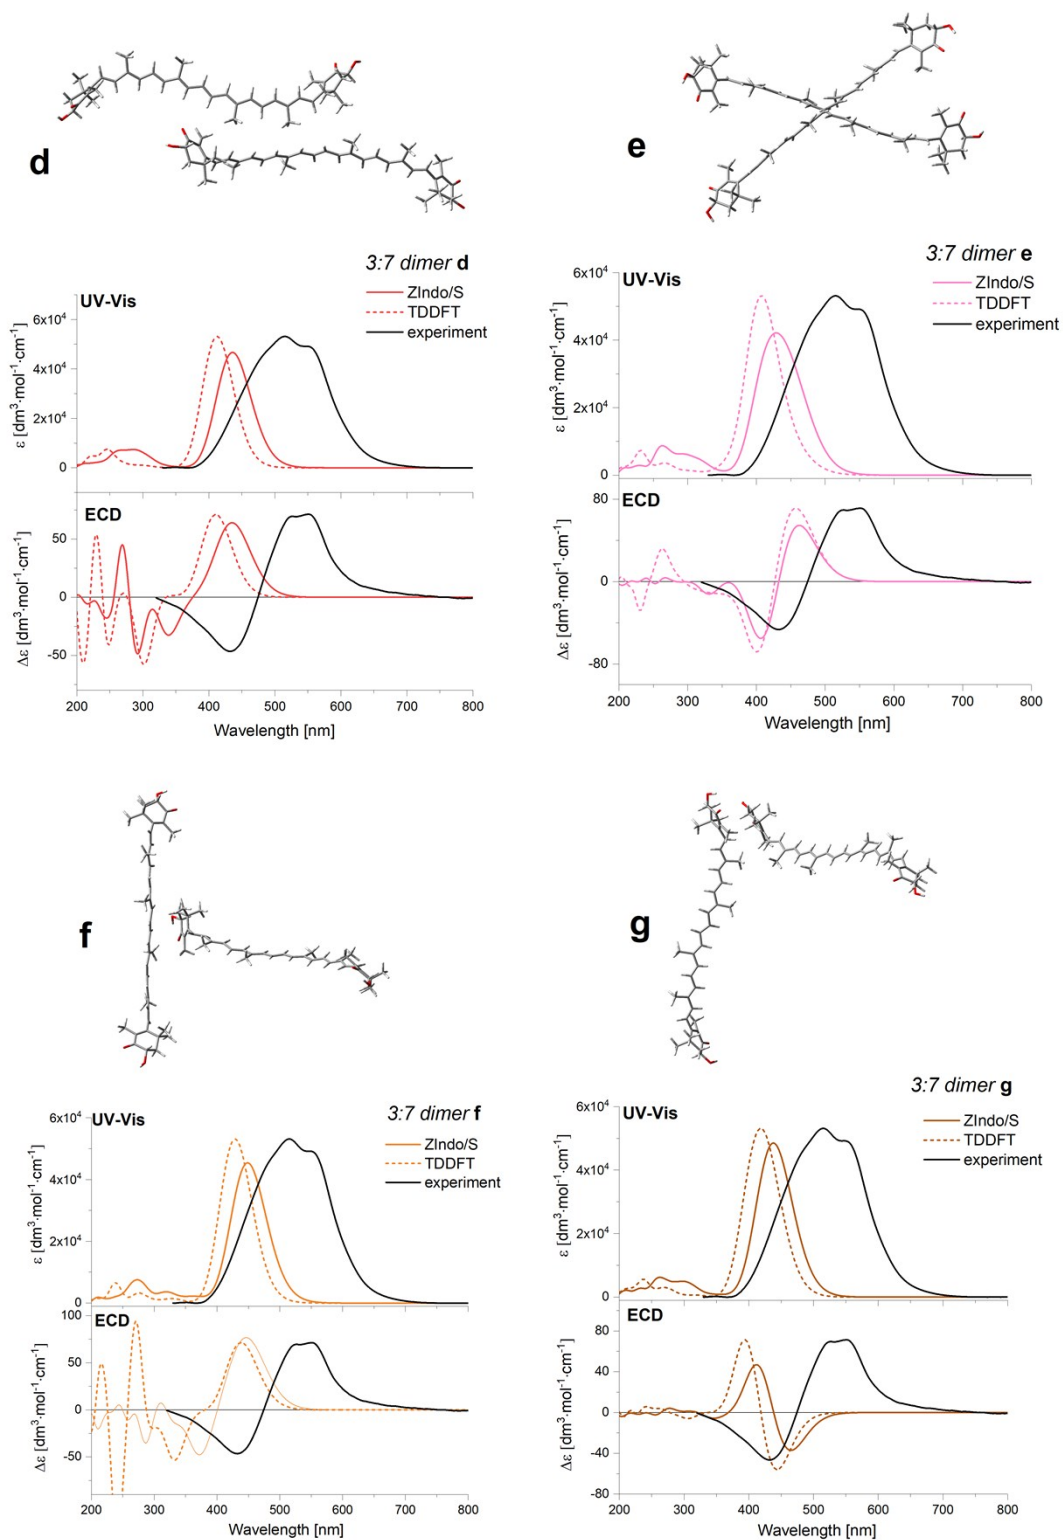

**Fig. S9** UV-Vis and ECD spectra of typical structures taken from the 3:7 (d-g) dimer MD simulation models.

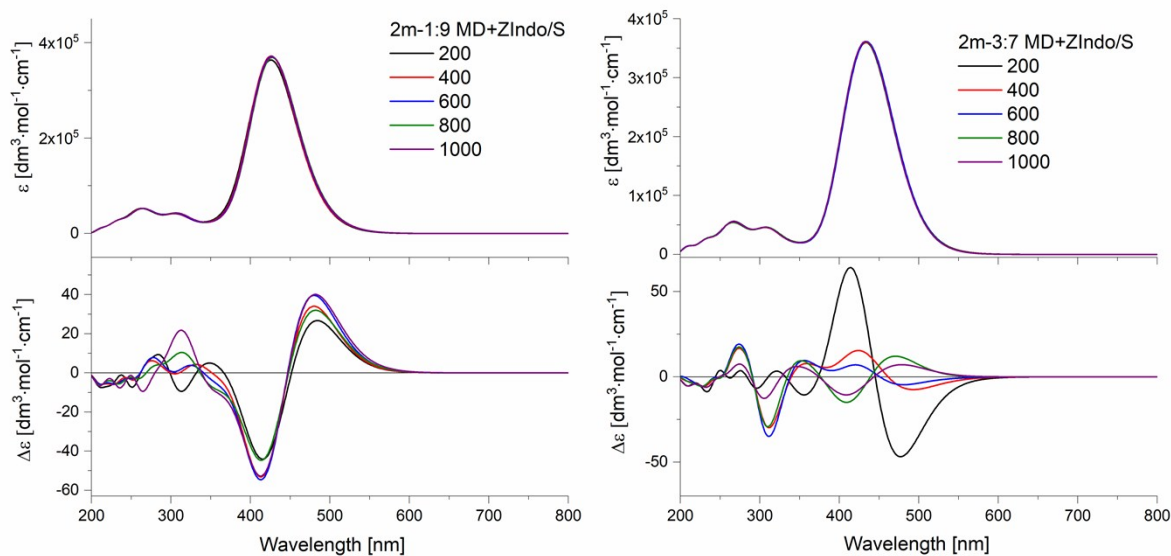

**Fig. S10** UV-Vis and ECD spectra of simulated AXT dimers (1:9 left panel, 3:7 right panel) at ZIndo/S theory level, averaged over 200, 400, 600, 800 and 1000 MD clusters.

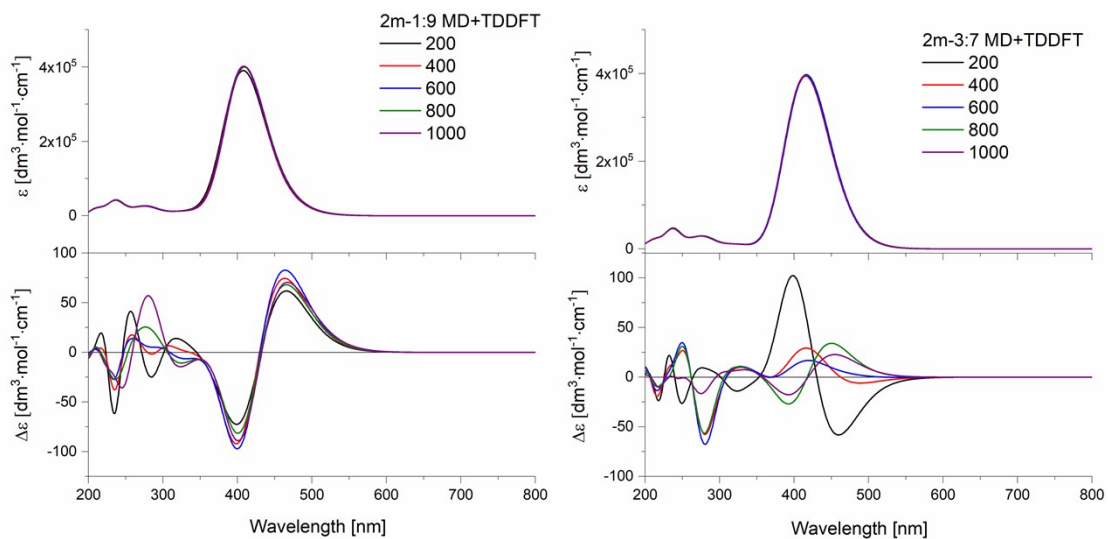

**Fig. S11** UV-Vis and ECD spectra of simulated AXT dimers (1:9 left panel, 3:7 right panel) at TD-DFT theory level, averaged over 200, 400, 600, 800 and 1000 MD clusters.



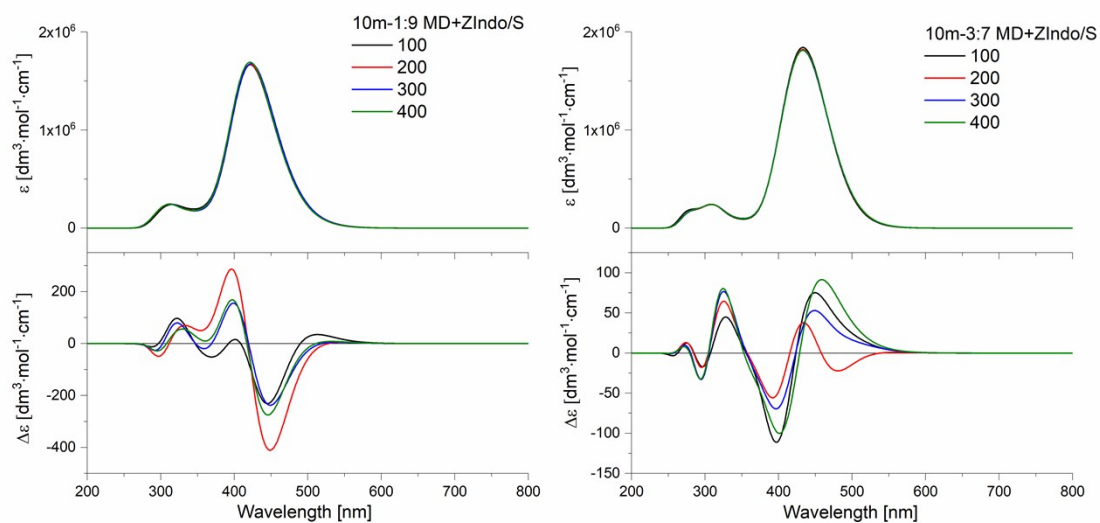

**Fig. S12** UV-Vis and ECD spectra of simulated AXT decamers (1:9 left panel, 3:7 right panel) at ZIndo/S theory level, averaged over 100, 200, 300 and 400 MD clusters.

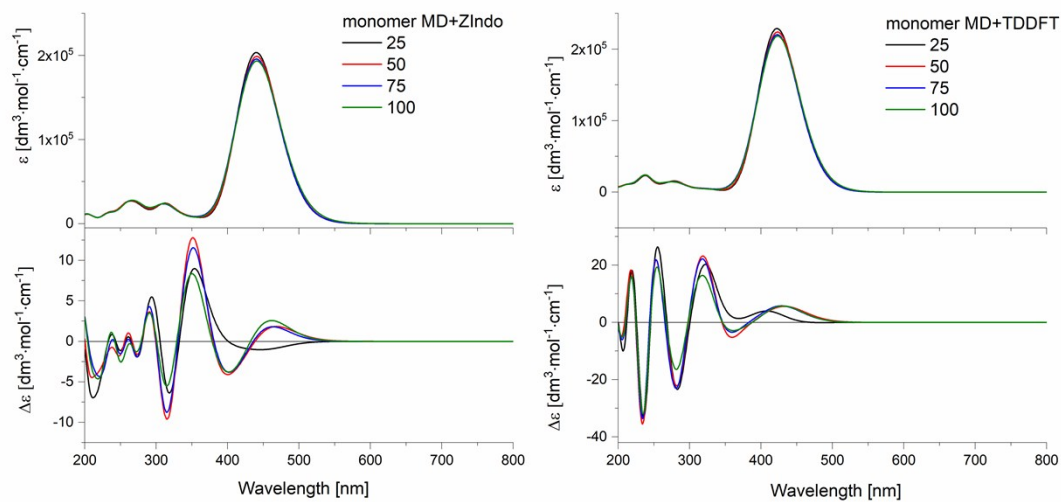

**Fig. S13** UV-Vis and ECD spectra of simulated AXT monomers at ZIndo/S and TD-DFT theory level, averaged over 25, 50, 75, 100 MD clusters.

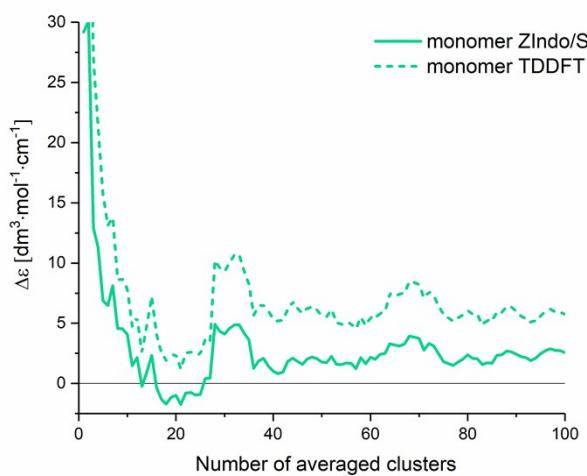

**Fig. S14** ECD intensities ( $\Delta\epsilon$ ) of simulated AXT monomers at 462 nm (ZIndo/S) and 431 nm (TD-DFT), as a function of the number of averaged clusters.

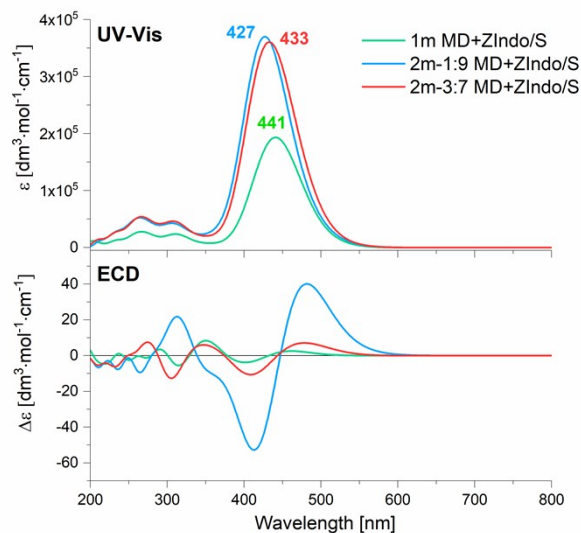

**Fig. S15** Calculated UV-Vis and ECD spectra of the 1:9 and 3:7-dimer models and monomer at the ZIndo/S theory level, averaged over 1000 (dimers) or 100 (monomer) single spectra of extracted MD clusters.

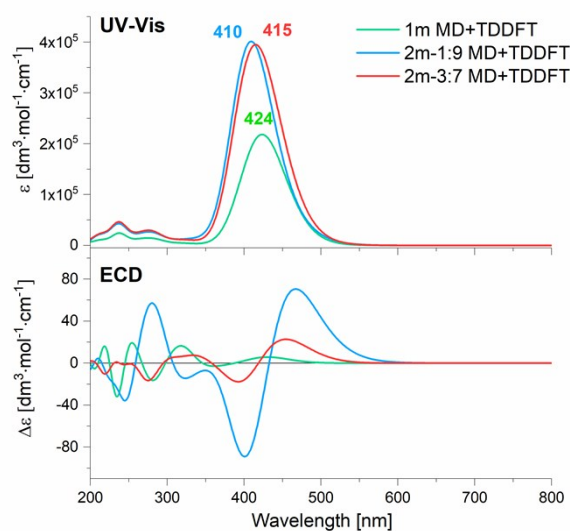

**Fig. S16** Calculated UV-Vis and ECD spectra of the 1:9 and 3:7-dimer models and monomer at the TDDFT/CAM-B3LYP/Def2SVP theory level, averaged over 1000 (dimers) or 100 (monomer) single spectra of extracted MD clusters.

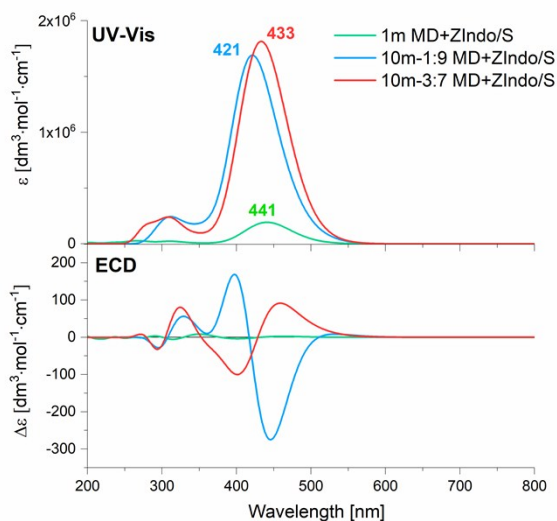

**Fig. S17** Calculated UV-Vis and ECD spectra of the 1:9 and 3:7-decamer models and monomer at the ZIndo/S theory level, averaged over 400 (decamers) or 100 (monomer) single spectra of extracted MD clusters.

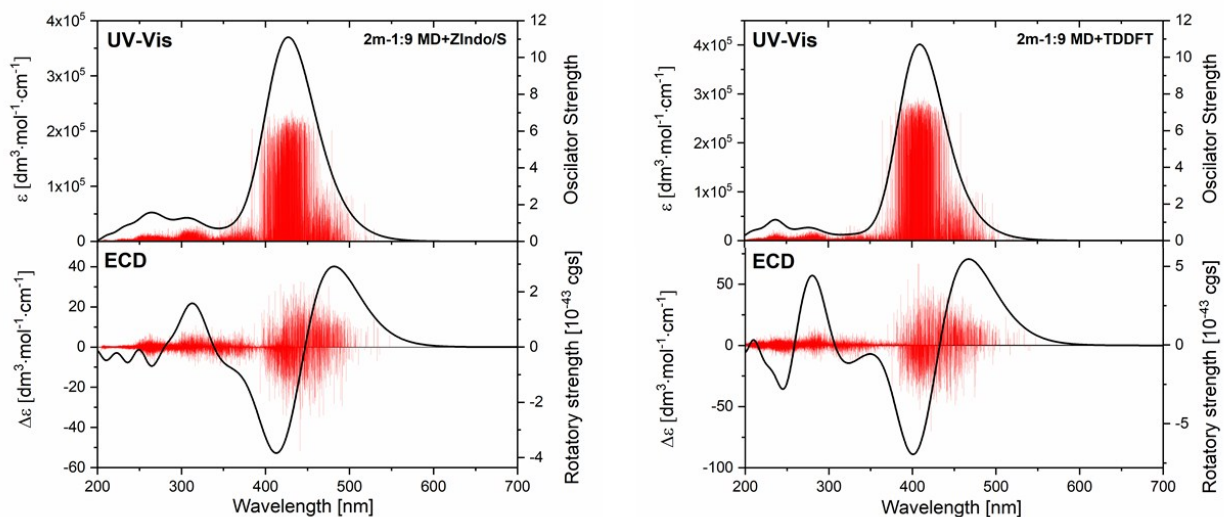

**Fig. S18** Averaged UV-Vis and ECD spectra, together with oscillator and rotatory strengths intensity, from all extracted MD clusters of *1:9-dmier* model, calculated at the ZIndo/S and TD-DFT theory level.

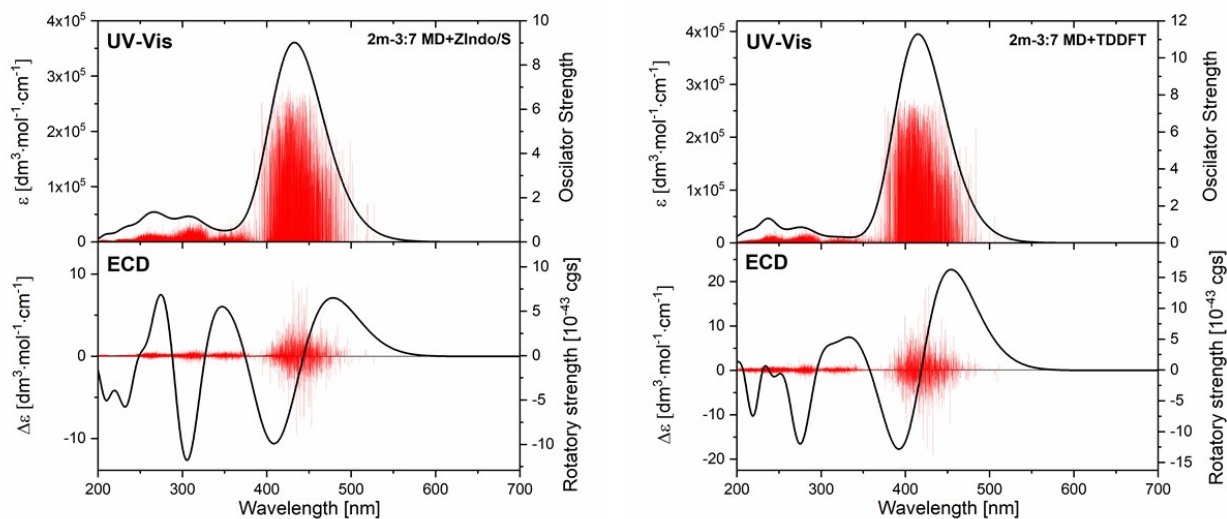

**Fig. S19** Averaged UV-Vis and ECD spectra, together with oscillator and rotatory strengths intensity, from all extracted MD clusters of *3:7-dmier* model, calculated at the ZIndo/S and TD-DFT theory level.

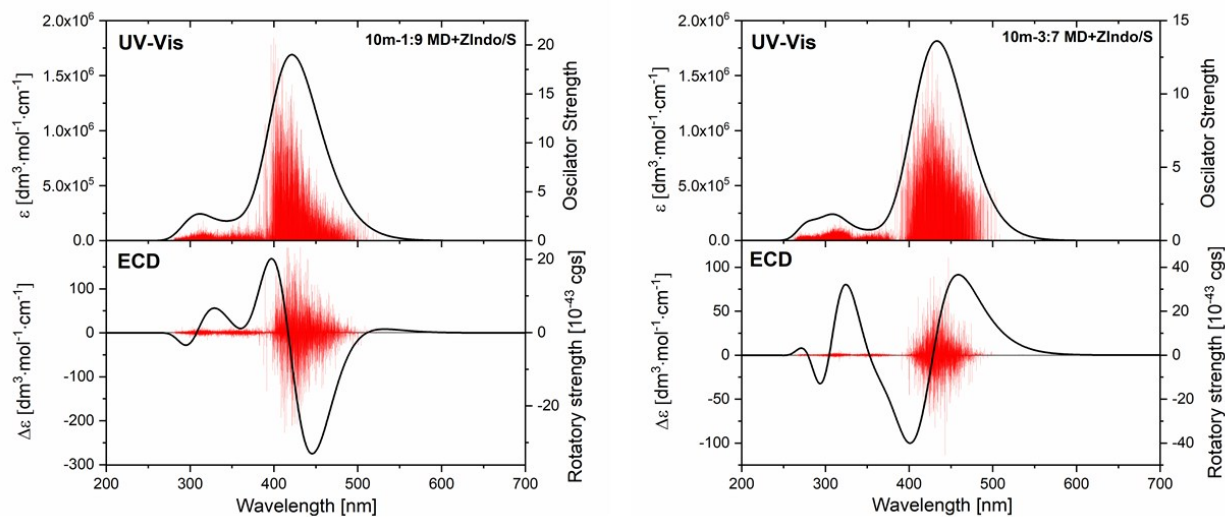

**Fig. S20** Averaged UV-Vis and ECD spectra, together with oscillator and rotatory strengths intensity, from all extracted MD clusters of *1:9-decamer* and *3:7-decamer* models, calculated at the ZIndo/S theory level.

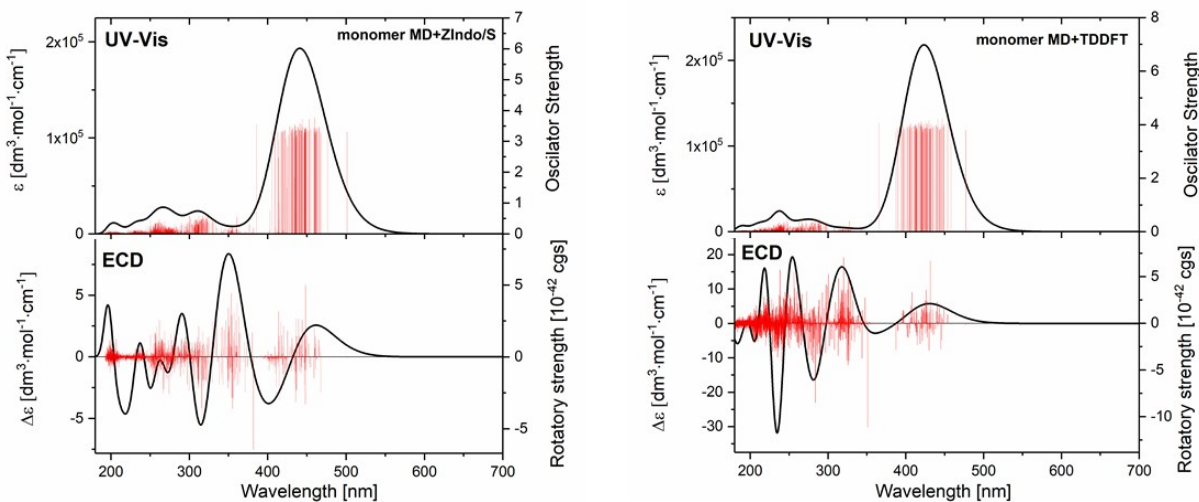

**Fig. S21** Averaged UV-Vis and ECD spectra, together with oscillator and rotatory strengths intensity, from all extracted MD clusters of *monomer* models, calculated at the ZIndo/S and TD-DFT theory level.

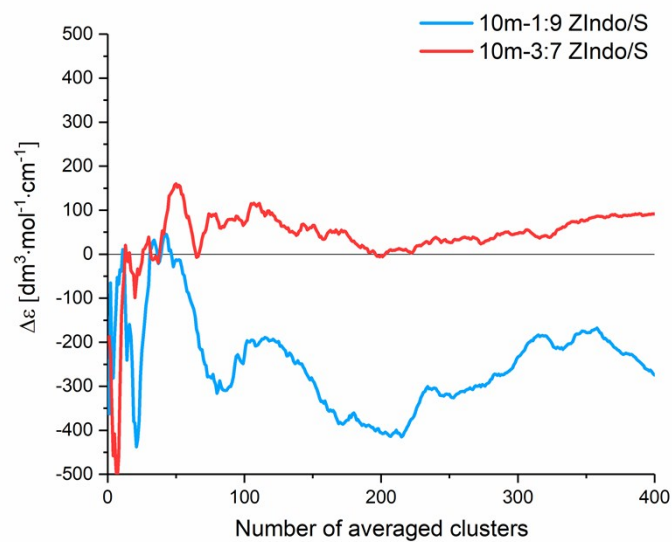

**Fig. S22** ECD intensities ( $\Delta\epsilon$ ) of simulated AXT decamers at 446 nm (1:9) and 459 nm (3:7), dependent on the number of averaged clusters.
